# Supplementary material
Source: HighWire-hosted journal article supplement (https://bmjopenrespres.bmj.com/content/10/1/e001657)
Supplement: inline-supplementary-material-1 [file inline-supplementary-material-1.pdf]

## SUPPLEMENTAL DATA

| Device                         | Fixed performance FiO <sub>2</sub>               | Flow l/min                              | Predicted FiO <sub>2</sub> |
|--------------------------------|--------------------------------------------------|-----------------------------------------|----------------------------|
| Nasal cannula                  |                                                  | 1                                       | 24                         |
| Nasal cannula                  |                                                  | 2                                       | 28                         |
| Nasal cannula                  |                                                  | 3                                       | 32                         |
| Nasal cannula                  |                                                  | 4                                       | 36                         |
| Simple mask                    |                                                  | 1                                       | 24                         |
| Simple mask                    |                                                  | 2                                       | 28                         |
| Simple mask                    |                                                  | 3                                       | 32                         |
| Simple mask                    |                                                  | 4                                       | 36                         |
| Simple mask                    |                                                  | 5                                       | 40                         |
| Simple mask                    |                                                  | 6                                       | 44                         |
| Simple mask                    |                                                  | 7                                       | 48                         |
| Simple mask                    |                                                  | 8                                       | 52                         |
| Simple mask                    |                                                  | 9                                       | 56                         |
| Simple mask                    |                                                  | >=10                                    | 60                         |
| Venturi                        | 24                                               | 2                                       |                            |
| Venturi                        | 28                                               | 4                                       |                            |
| Venturi                        | 35                                               | 8                                       |                            |
| Venturi                        | 40                                               | 10                                      |                            |
| Venturi                        | 60                                               | 12                                      |                            |
| NIV OR CPAP                    |                                                  | 1                                       | 24                         |
| NIV OR CPAP                    |                                                  | 2                                       | 26                         |
| NIV OR CPAP                    |                                                  | 3                                       | 28                         |
| NIV OR CPAP                    |                                                  | 4                                       | 30                         |
| NIV OR CPAP                    |                                                  | 5                                       | 32                         |
| NIV OR CPAP                    |                                                  | 6                                       | 34                         |
| NIV OR CPAP                    |                                                  | 7                                       | 36                         |
| NIV OR CPAP                    |                                                  | 8                                       | 38                         |
| NIV OR CPAP                    |                                                  | 9                                       | 40                         |
| NIV OR CPAP                    |                                                  | >=10                                    | 44                         |
| Humidified                     | 28                                               |                                         |                            |
| Humidified                     | 35                                               |                                         |                            |
| Humidified                     | 40                                               |                                         |                            |
| Humidified                     | 60                                               |                                         |                            |
| Tracheostomy mask              | Treat as per simple face mask                    |                                         |                            |
| HFNC                           | Continuous % O <sub>2</sub> values from 21 - 100 | Continuous flow rate values from 0 - 60 |                            |
| 100% Reservoir Mask<br>15l/min |                                                  | 15                                      | 80                         |

Table S1. Assigned FiO<sub>2</sub> value for fixed and variable performance oxygen delivery devices

| Cut point (GTE) | Sensitivity  | Specificity  | PPV          | NPV          | NNE         | Likelihood ratio +ve | Likelihood ratio -ve |
|-----------------|--------------|--------------|--------------|--------------|-------------|----------------------|----------------------|
| 0               | 100.00       | 0.00         | 2.65         |              | 37.74       | 1.00                 |                      |
| 1               | 98.98        | 20.32        | 3.27         | 99.86        | 30.57       | 1.24                 | 0.05                 |
| 2               | 97.40        | 40.25        | 4.25         | 99.82        | 23.54       | 1.63                 | 0.06                 |
| 3               | 92.99        | 59.20        | 5.84         | 99.68        | 17.12       | 2.28                 | 0.12                 |
| 4               | 83.96        | 74.53        | 8.24         | 99.42        | 12.14       | 3.30                 | 0.22                 |
| 5               | <b>72.31</b> | <b>85.83</b> | <b>12.20</b> | <b>99.13</b> | <b>8.20</b> | <b>5.10</b>          | <b>0.32</b>          |
| 6               | 54.52        | 91.88        | 15.46        | 98.67        | 6.47        | 6.72                 | 0.49                 |
| 7               | <b>37.53</b> | <b>95.75</b> | <b>19.39</b> | <b>98.25</b> | <b>5.16</b> | <b>8.84</b>          | <b>0.65</b>          |
| 8               | 24.41        | 97.81        | 23.29        | 97.94        | 4.29        | 11.16                | 0.77                 |
| 9               | 12.22        | 99.03        | 25.59        | 97.64        | 3.91        | 12.64                | 0.89                 |
| 10              | 6.11         | 99.58        | 28.15        | 97.50        | 3.55        | 14.39                | 0.94                 |
| 11              | 3.22         | 99.81        | 32.10        | 97.43        | 3.12        | 17.37                | 0.97                 |
| 12              | 1.58         | 99.92        | 34.98        | 97.39        | 2.86        | 19.77                | 0.99                 |
| 13              | 0.74         | 99.97        | 38.22        | 97.37        | 2.62        | 22.73                | 0.99                 |
| 14              | 0.34         | 99.98        | 35.28        | 97.36        | 2.83        | 20.03                | 1.0                  |
| 15              | 0.20         | 100          | 69.99        | 97.36        | 1.43        | 85.64                | 1.0                  |
| 18              | 0.03         | 100          | 100.0        | 97.35        | 1.00        |                      | 1.0                  |

**Table S2. Sensitivity, specificity, PPV, NPV and NNE for NEWS2 for whole cohort for the primary outcome NB. Prevalence = 2.65%. Youden calculation: maximum value 58.49 at NEWS  $\geq$ 4. PPV, positive predictive value; NPV, negative predictive value; NNE, number needed to evaluate; LR, likelihood ratio; GTE, greater than or equal to (n=133349)**

| Cut point (GTE) | Sensitivity  | Specificity  | PPV          | NPV          | NNE         | Likelihood ratio +ve | Likelihood ratio -ve |
|-----------------|--------------|--------------|--------------|--------------|-------------|----------------------|----------------------|
| 0               | 100          | 0.30         | 2.65         | 100          | 37.74       | 1.00                 |                      |
| 1               | 98.98        | 20.71        | 3.28         | 99.87        | 30.52       | 1.24                 | 0.05                 |
| 2               | 95.33        | 46.87        | 4.64         | 99.73        | 21.53       | 1.79                 | 0.10                 |
| 3               | 88.80        | 67.67        | 6.94         | 99.55        | 14.41       | 2.74                 | 0.17                 |
| 4               | 80.49        | 81.91        | 10.77        | 99.36        | 9.28        | 4.45                 | 0.24                 |
| 5               | <b>68.38</b> | <b>89.39</b> | <b>14.89</b> | <b>99.05</b> | <b>6.72</b> | <b>6.45</b>          | <b>0.35</b>          |
| 6               | 55.60        | 93.88        | 19.78        | 98.73        | 5.05        | 9.09                 | 0.47                 |

|          |              |              |              |              |             |              |             |
|----------|--------------|--------------|--------------|--------------|-------------|--------------|-------------|
| <b>7</b> | <b>40.70</b> | <b>96.55</b> | <b>24.25</b> | <b>98.36</b> | <b>4.12</b> | <b>11.79</b> | <b>0.61</b> |
| 8        | 26.64        | 98.13        | 27.87        | 98.01        | 3.59        | 14.23        | 0.75        |
| 9        | 15.50        | 99.05        | 30.73        | 97.73        | 3.25        | 16.34        | 0.85        |
| 10       | 7.86         | 99.54        | 31.84        | 97.54        | 3.14        | 17.21        | 0.93        |
| 11       | 3.99         | 99.80        | 35.08        | 97.45        | 2.85        | 19.90        | 0.96        |
| 12       | 2.01         | 99.91        | 37.88        | 97.40        | 2.64        | 22.47        | 0.98        |
| 13       | 1.05         | 99.95        | 35.49        | 97.38        | 2.82        | 20.27        | 0.99        |
| 14       | 0.59         | 99.98        | 45.56        | 97.36        | 2.19        | 30.84        | 0.99        |
| 15       | 0.17         | 99.99        | 33.25        | 97.35        | 3.01        | 18.35        | 1.00        |
| 16       | 0.08         | 100          | 74.93        | 97.35        | 1.33        | 119.10       | 1.00        |
| 17       | 0.03         | 100          | 100.00       | 97.35        | 1.00        |              | 1.00        |

**Table S3. Sensitivity, specificity, PPV, NPV and NNE for NEWS-FiO<sub>2</sub> for whole cohort for the primary outcome. NB. Prevalence = 2.65%. Youden calculation: maximum value 62.34 at NEWS >=4. PPV, positive predictive value; NPV, negative predictive value; NNE, number needed to evaluate; LR, likelihood ratio; GTE, greater than or equal to (n=133349)**

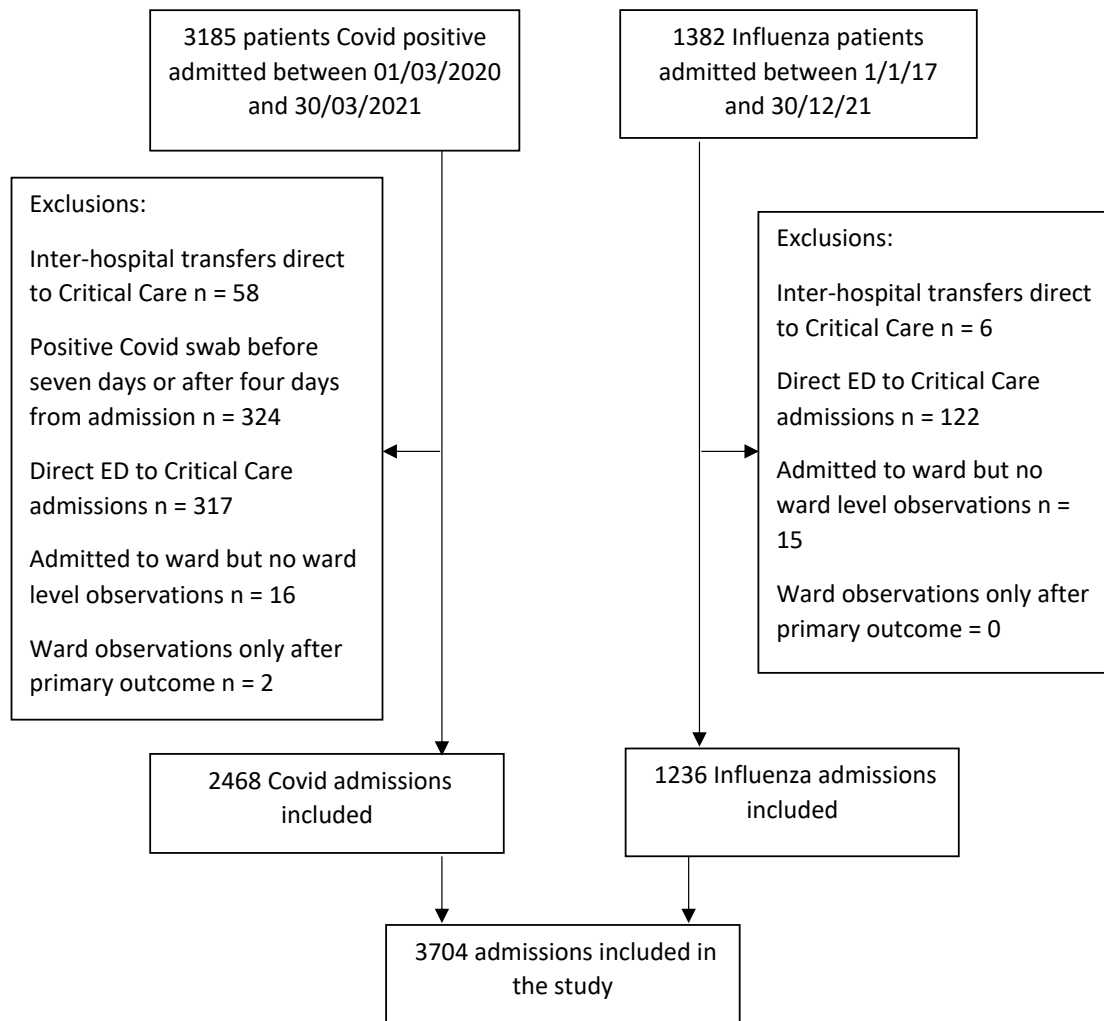

Figure S1. Flow diagram of patient study population
